# Supplementary material
Source: Springer Nature journal article supplement (https://mbexc.uni-goettingen.de/archive/1/721/5adb5ac0f259abf4/download)
Supplement: MOESM3 [file 41594_2026_1803_MOESM3_ESM.pdf › 41594_2026_1803_MOESM3_ESM.pdf]

Figure 1 b

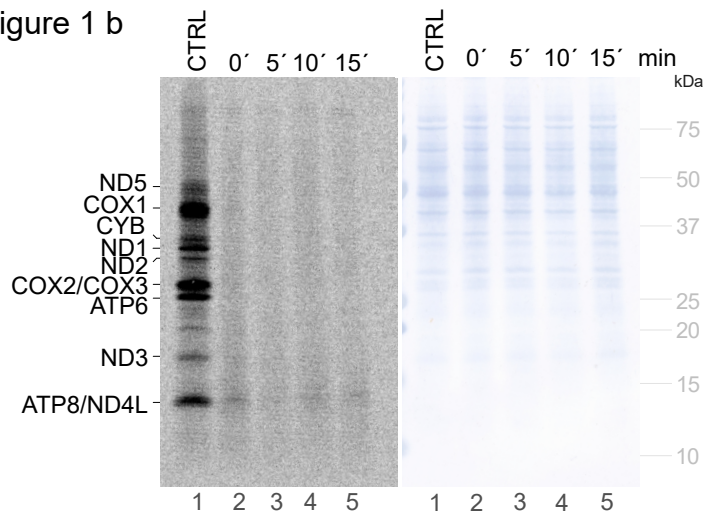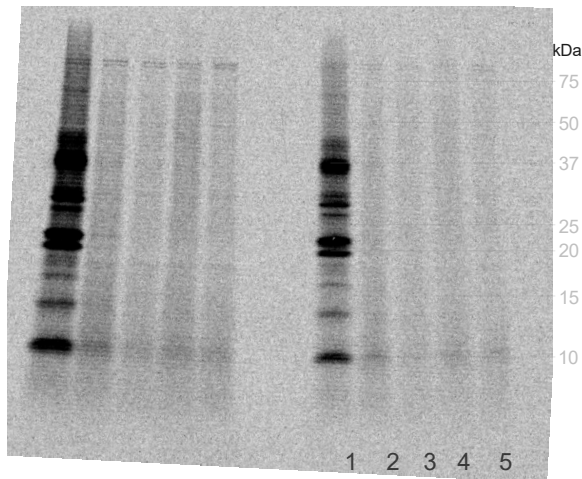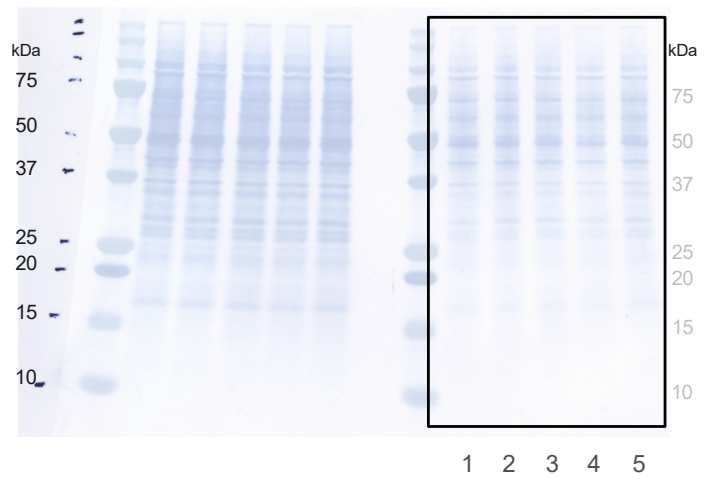

Raw data Figure 1 b Schoendorf et al., 2025

Figure 1 c

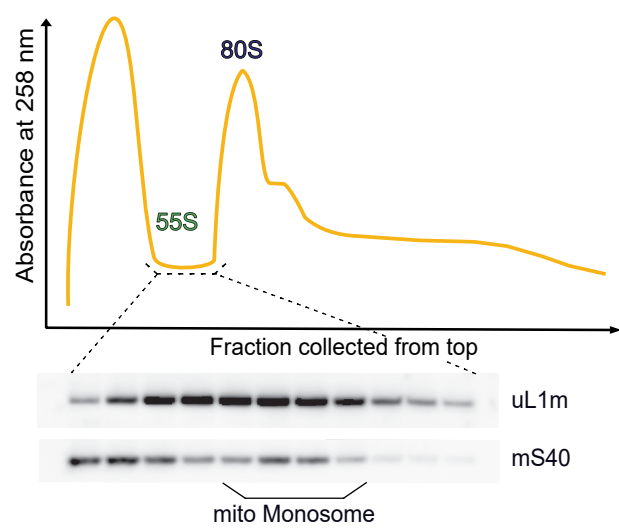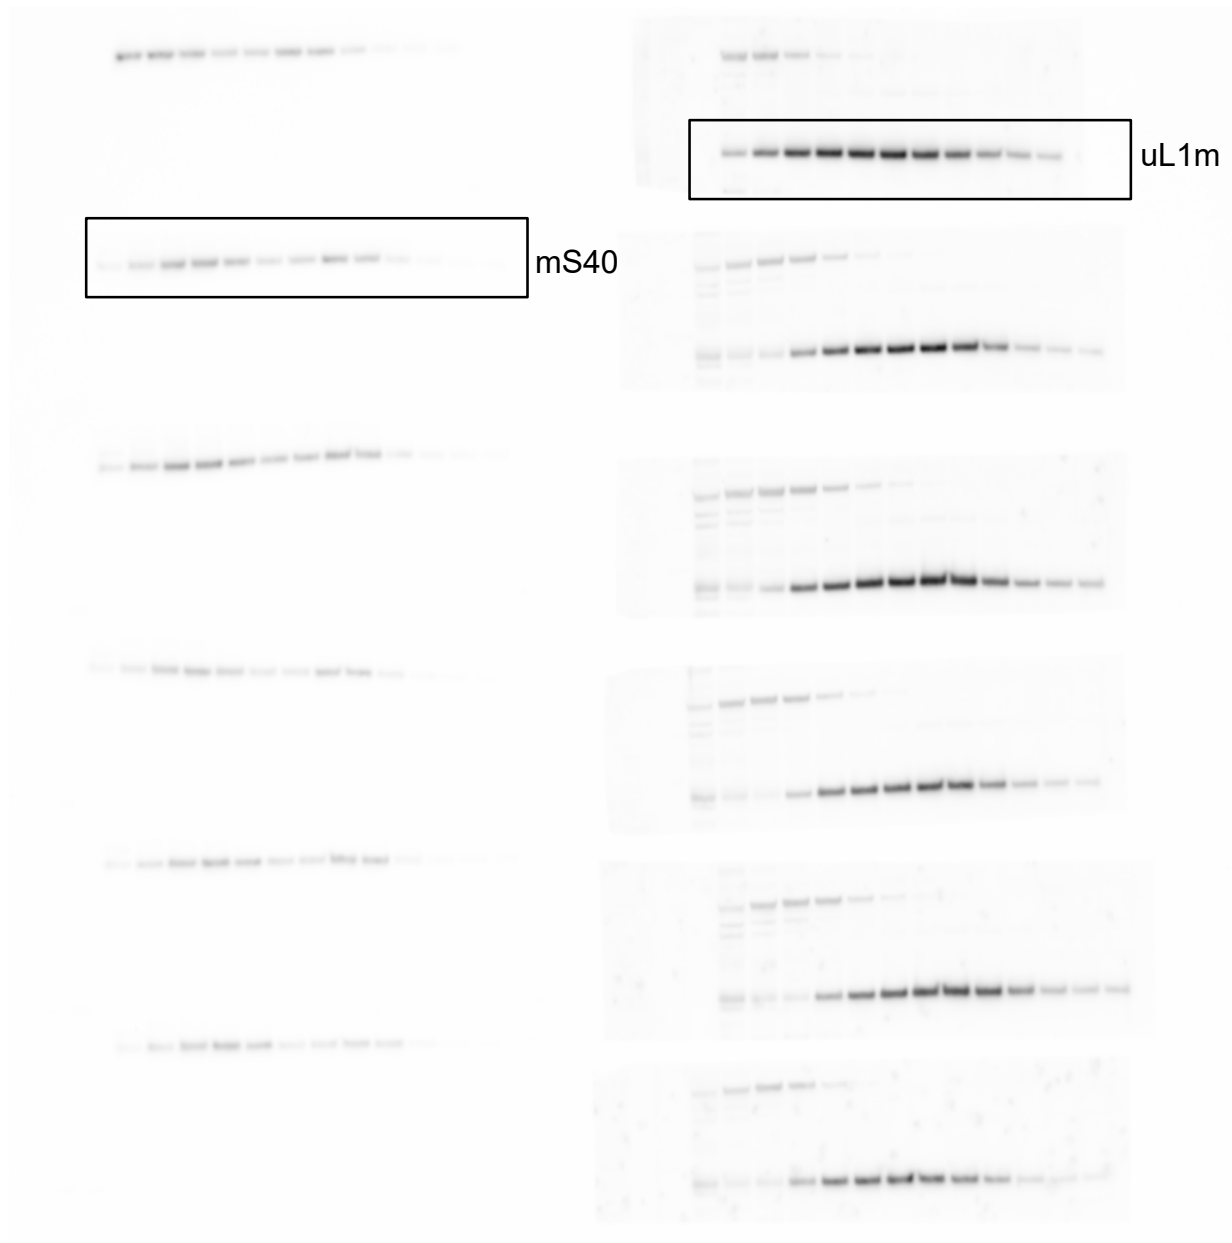

Figure 1 d

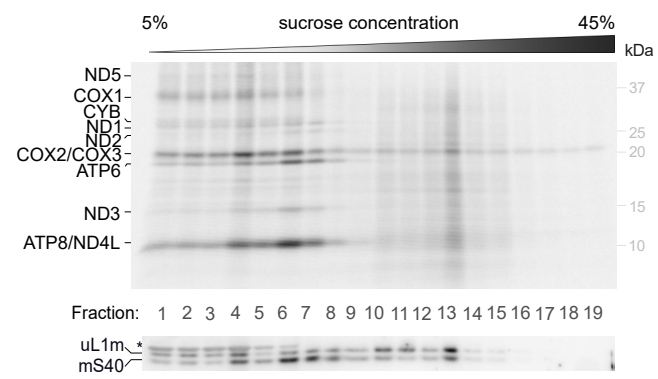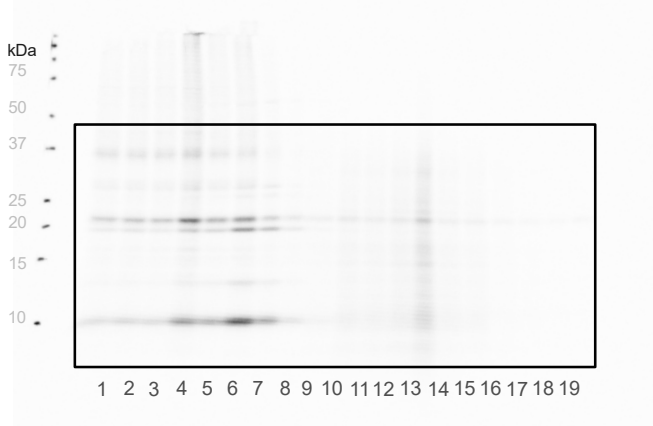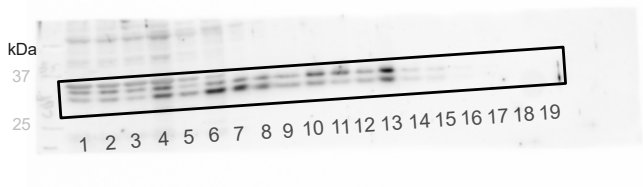

Raw data Figure 1 d Schoendorf et al., 2025
