# Supplementary material
Source: Springer Nature journal article supplement (https://mbexc.uni-goettingen.de/archive/1/721/5adb5ac0f259abf4/download)
Supplement: MOESM4 [file 41594_2026_1803_MOESM4_ESM.pdf › 41594_2026_1803_MOESM4_ESM.pdf]

Figure 2 b

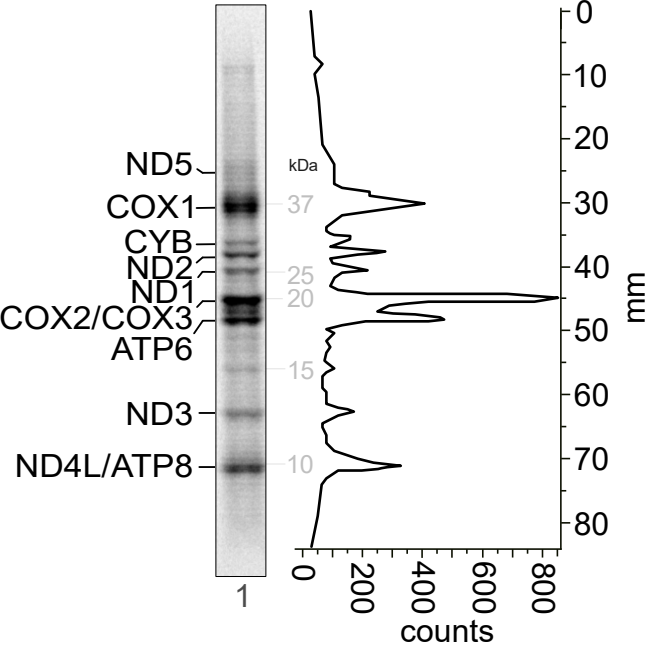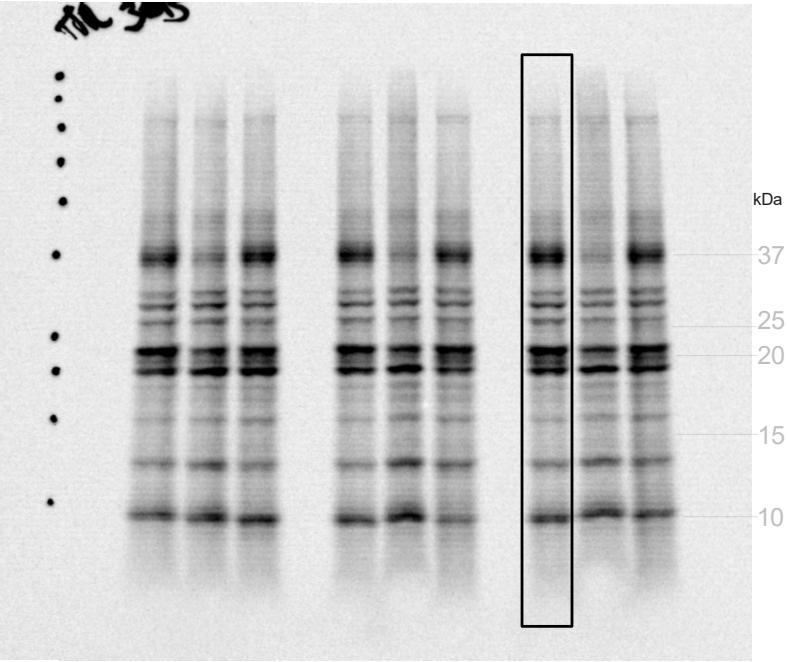

Raw data Figure 2 b Schoendorf et al., 2025
