# Supplementary material
Source: Springer Nature journal article supplement (https://mbexc.uni-goettingen.de/archive/1/721/5adb5ac0f259abf4/download)
Supplement: MOESM5 [file 41594_2026_1803_MOESM5_ESM.pdf › 41594_2026_1803_MOESM5_ESM.pdf]

Figure 4 a

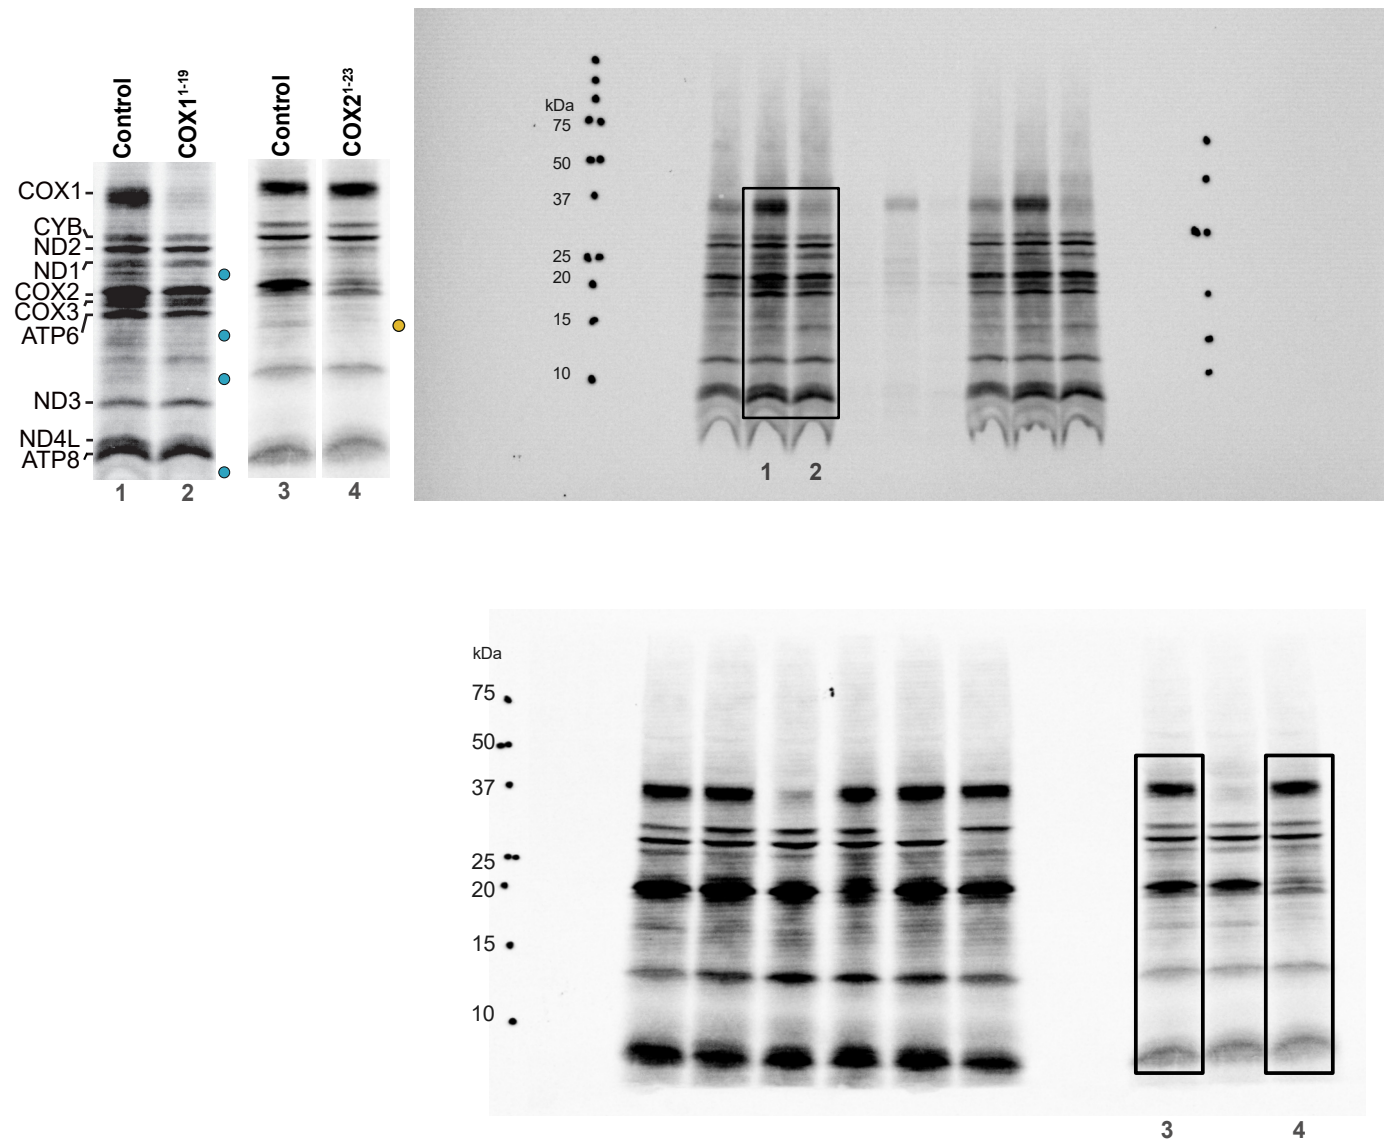

Raw data Figure 4 a Schoendorf et al., 2025

Figure 4 b

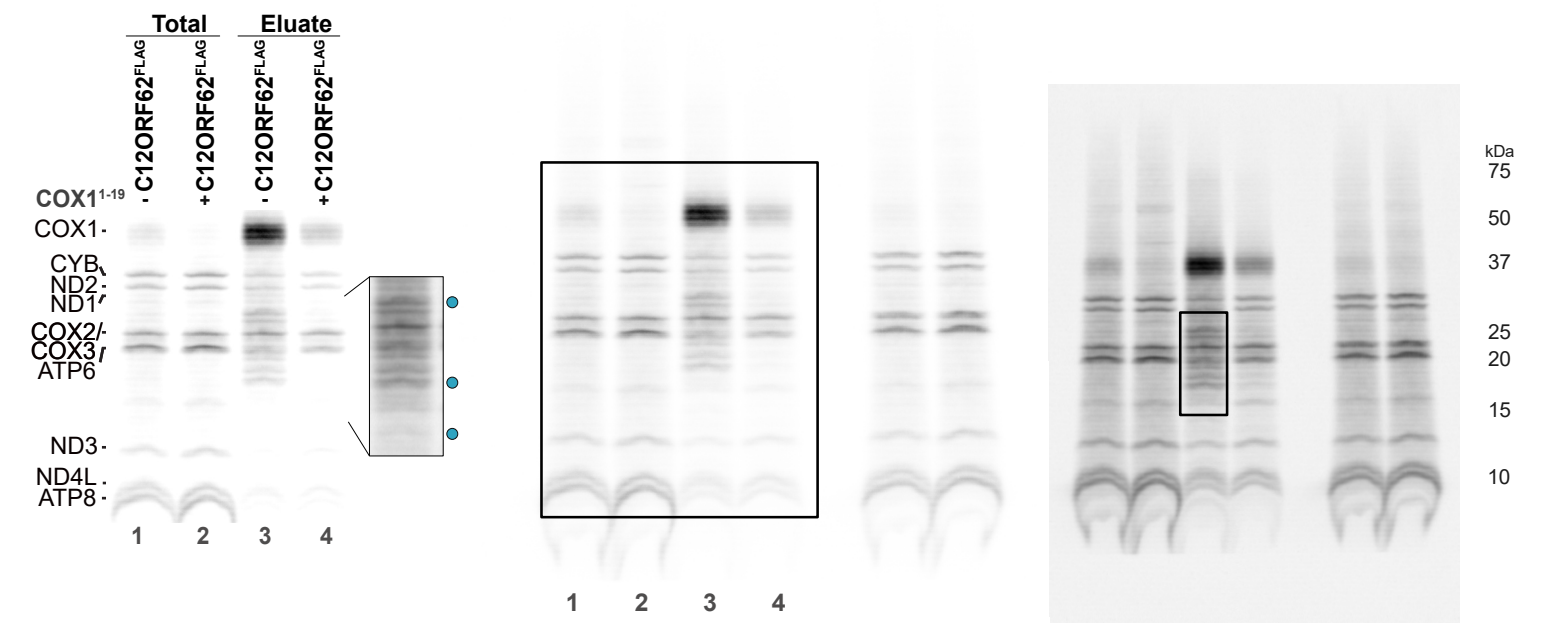

Raw data Figure 4 b Schoendorf et al., 2025

Figure 4 c

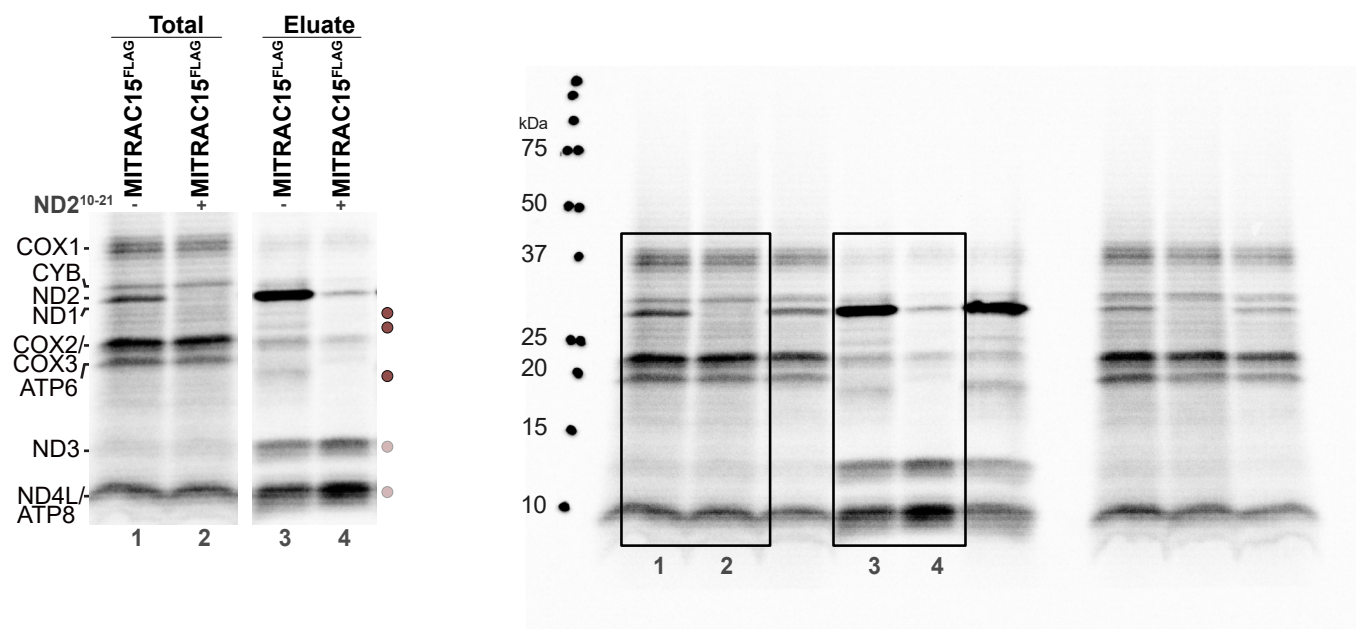

Raw data Figure 4 c Schoendorf et al., 2025
