# Supplementary material
Source: Springer Nature journal article supplement (https://mbexc.uni-goettingen.de/archive/1/721/5adb5ac0f259abf4/download)

Figure 6 b

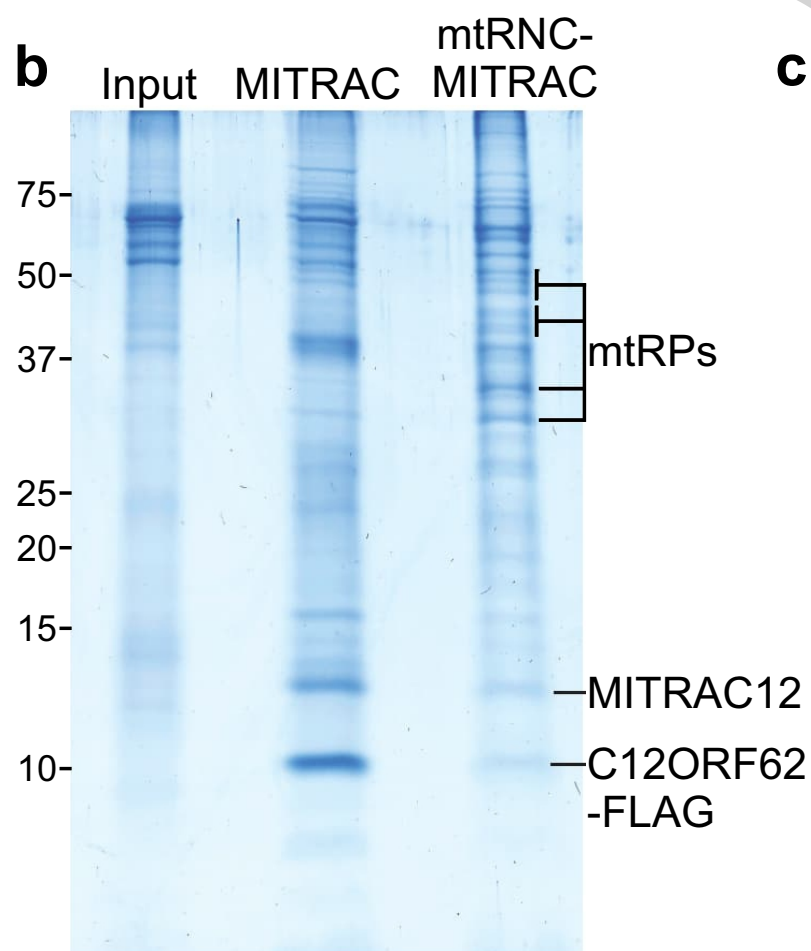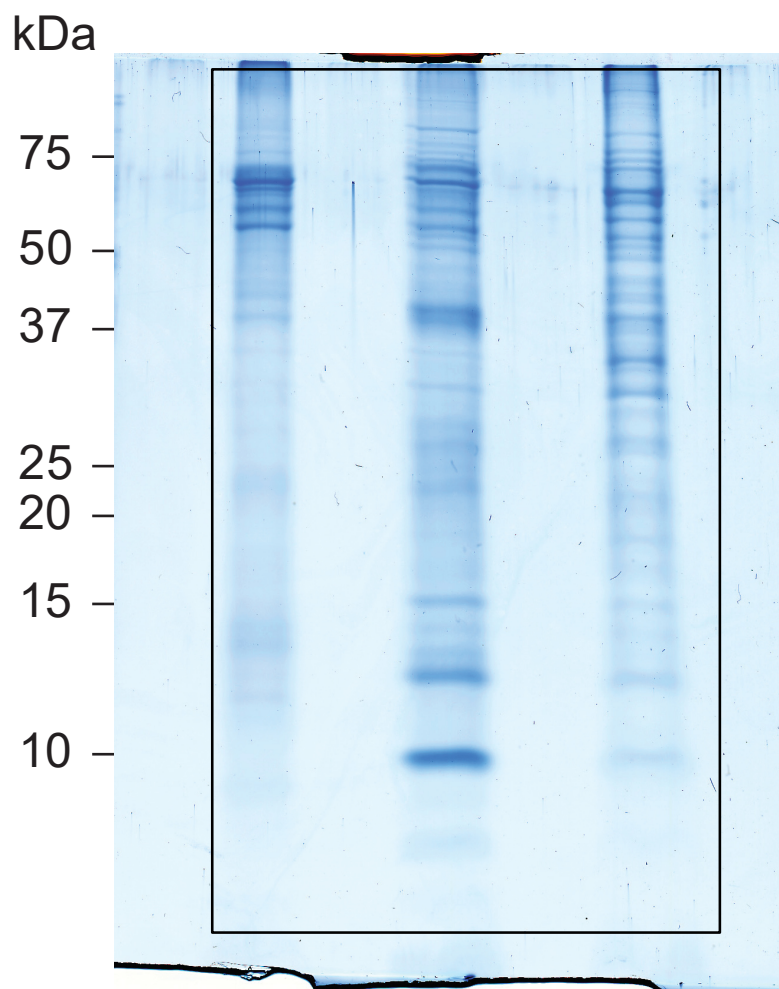

Supplement: MOESM6 [file 41594_2026_1803_MOESM6_ESM.pdf › 41594_2026_1803_MOESM6_ESM.pdf]
