# Supplementary material
Source: Springer Nature journal article supplement (https://mbexc.uni-goettingen.de/archive/1/721/5adb5ac0f259abf4/download)
Supplement: MOESM7 [file 41594_2026_1803_MOESM7_ESM.pdf › 41594_2026_1803_MOESM7_ESM.pdf]

Extend data figure 1 a

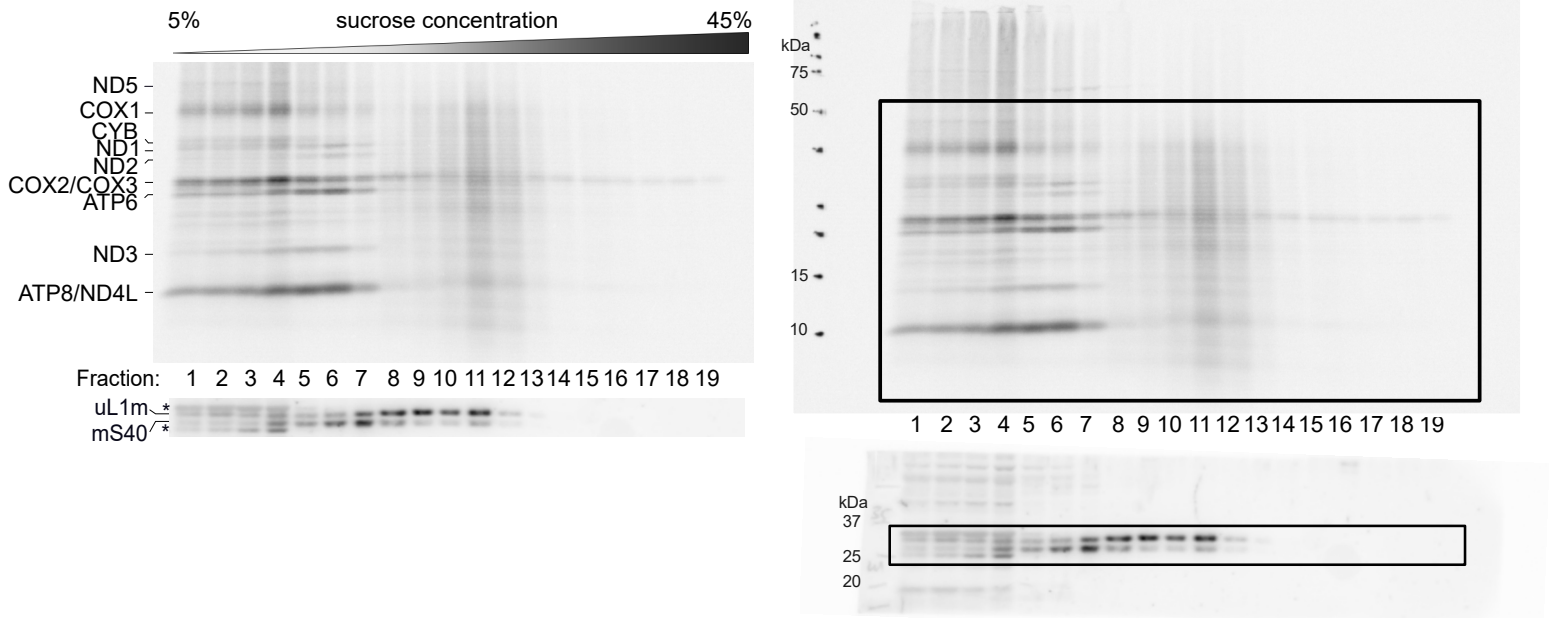

Rawdata extended data Figure 1 a Schoendorf et al., 2025

Extended data figure 1 c

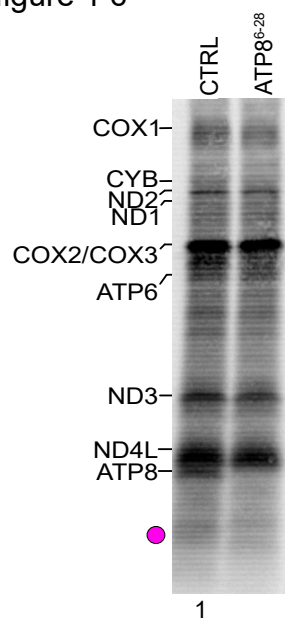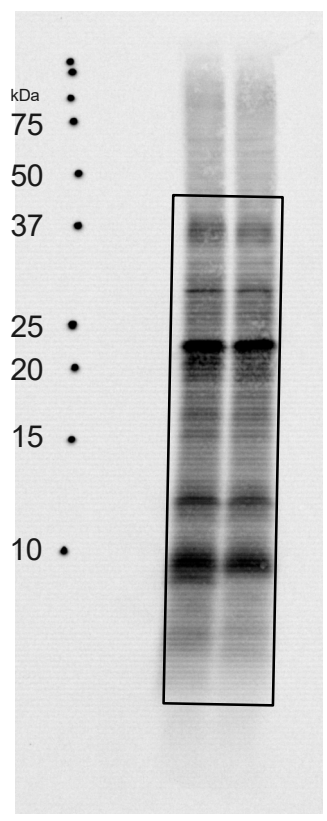

Rawdata extended data Figure 1 c Schoendorf et al., 2025
